# Supplementary material
Source: MDPI journal article supplement (https://www.mdpi.com/2073-4352/13/7/1107)
Supplement: s1 [file s1]

# Supporting Information

## Heavy Alkyl-benzene Sulfonate controlled Growth of Aragonite-Based Polymorphic CaCO<sub>3</sub> Crystals in Emulsion

Weiwei He<sup>1</sup>, Junqing Hu<sup>2</sup>, Weihao Sun<sup>2</sup>, Jiqiong Liu<sup>3</sup>, Hongguang Guo<sup>3</sup>, Changming Zhao<sup>3</sup>, Qingguo Wang<sup>3</sup>, Xiangbin Liu<sup>3,4</sup>, Meng Cai<sup>3</sup> and Weiguang Shi<sup>4,5\*</sup>

- <sup>1</sup> School of Mechatronic Engineering, Daqing Normal University, Daqing 163712, China.
  - <sup>2</sup> No.2 oil production factory of Daqing Oilfield Ltd., Daqing 163414, China.
  - <sup>3</sup> Oil Production Engineering Research Institute of Daqing Oilfield Ltd., Daqing 163453, China.
  - <sup>4</sup> College of Chemistry & Chemical Engineering, Northeast Petroleum University, Daqing 163318, China.
  - <sup>5</sup> Key Laboratory of Continental Shale Hydrocarbon Accumulation and Efficient Development, Ministry of Education, Northeast Petroleum University, Daqing 163318, China.
- \* E-mail: sswwgg2003@126.com

ORCID ID of Weiguang Shi is 0000-0003-2376-9413.

**Table S1.** Fraction of vaterite, aragonite and calcite in kerosene emulsions with various concentrations of HABS.

| Sample | [CaCl <sub>2</sub> ]<br>(mol/L) | [Na <sub>2</sub> CO <sub>3</sub> ]<br>(mol/L) | HABS<br>(mol/L) | Temp.<br>(°C) | Time<br>(min) | Content<br>of<br>Vaterite | Content<br>of<br>Aragonite | Content<br>of<br>Calcite |
|--------|---------------------------------|-----------------------------------------------|-----------------|---------------|---------------|---------------------------|----------------------------|--------------------------|
| 1a     | 0.01                            | 0.01                                          | 200             | 45            | 60            | 39.54%                    | 29.38%                     | 31.08%                   |
| 1b     | 0.01                            | 0.01                                          | 400             | 45            | 60            | 43.96%                    | 11.22%                     | 44.82%                   |
| 1c     | 0.01                            | 0.01                                          | 600             | 45            | 60            | 52.46%                    | 12.42%                     | 35.12%                   |
| 1d     | 0.01                            | 0.01                                          | 800             | 45            | 60            | 48.63%                    | 0                          | 51.37%                   |
| 1e     | 0.01                            | 0.01                                          | 1000            | 45            | 60            | 68.38%                    | 0                          | 31.62%                   |

**Table S2.** Fraction of vaterite, aragonite and calcite in kerosene emulsions with various reaction times.

| Sample | [CaCl <sub>2</sub> ]<br>(mol/L) | [Na <sub>2</sub> CO <sub>3</sub> ]<br>(mol/L) | HABS<br>(mg/L) | Temp<br>(°C) | Time<br>(min) | Content<br>of<br>Vaterite | Content<br>of<br>Aragonite | Content<br>of<br>Calcite |
|--------|---------------------------------|-----------------------------------------------|----------------|--------------|---------------|---------------------------|----------------------------|--------------------------|
| 2a     | 0.01                            | 0.01                                          | 600            | 45           | 5             | 86.11%                    | 0                          | 13.89%                   |
| 2b     | 0.01                            | 0.01                                          | 600            | 45           | 10            | 88.54%                    | 0                          | 11.46%                   |
| 2c     | 0.01                            | 0.01                                          | 600            | 45           | 20            | 93.01%                    | 0                          | 6.99%                    |
| 2d     | 0.01                            | 0.01                                          | 600            | 45           | 30            | 82.96%                    | 4.55%                      | 12.49%                   |
| 2e     | 0.01                            | 0.01                                          | 600            | 45           | 60            | 53.72%                    | 12.27%                     | 34.01%                   |

**Table S3.** Fraction of vaterite, aragonite and calcite in kerosene emulsions with various reaction temperatures.

| Sample | [CaCl <sub>2</sub> ]<br>(mol/L) | [Na <sub>2</sub> CO <sub>3</sub> ]<br>(mol/L) | HABS<br>(mg/L) | Temp<br>(°C) | Time<br>(min) | Content<br>of<br>Vaterite | Content<br>of<br>Aragonite | Content<br>of<br>Calcite |
|--------|---------------------------------|-----------------------------------------------|----------------|--------------|---------------|---------------------------|----------------------------|--------------------------|
| 3a     | 0.01                            | 0.01                                          | 600            | 35           | 60            | 88.97%                    | 0                          | 11.03%                   |
| 3b     | 0.01                            | 0.01                                          | 600            | 45           | 60            | 43.57%                    | 5.55%                      | 50.88%                   |
| 3c     | 0.01                            | 0.01                                          | 600            | 55           | 60            | 41.48%                    | 19.19%                     | 39.33%                   |
| 3d     | 0.01                            | 0.01                                          | 600            | 65           | 60            | 43.17%                    | 47.38%                     | 9.45%                    |
| 3e     | 0.01                            | 0.01                                          | 600            | 75           | 60            | 18.03%                    | 65.06%                     | 16.91%                   |
| 3f     | 0.01                            | 0.01                                          | 600            | 85           | 60            | 16.10%                    | 66.74%                     | 17.16%                   |

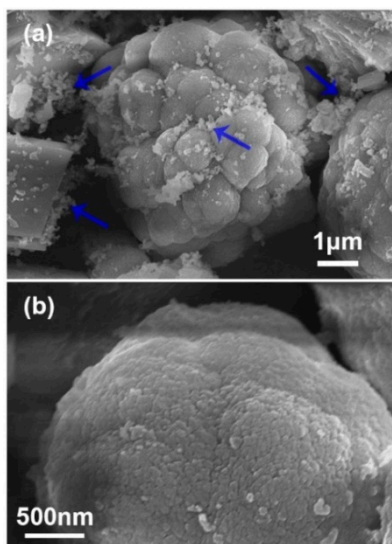

**Figure S1.** SEM images of vaterites particles and the corresponding enlarged view.

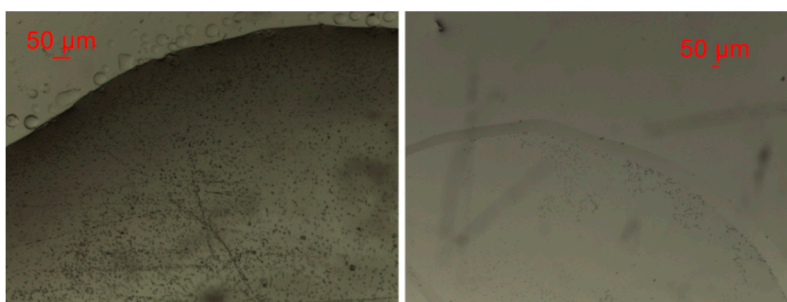

**Figure S2.** Images of ACC migration. Left: water, Right: HABS/kerosene /water.

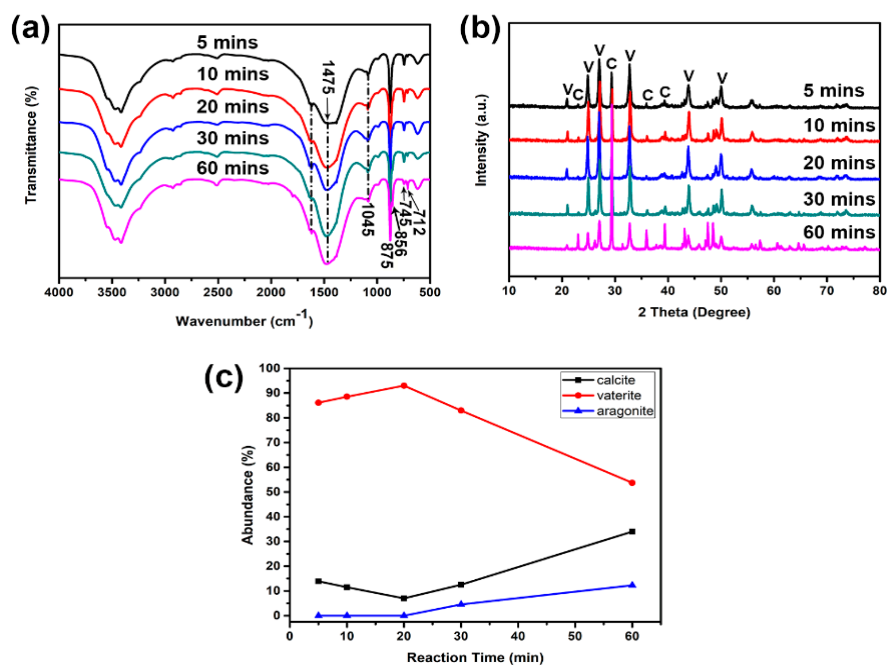

**Figure S3.** FTIR, XRD and content variation of CaCO<sub>3</sub> at 45 °C under various reaction times (5 mins, 10 mins, 20 mins, 30 mins, and 60 mins).

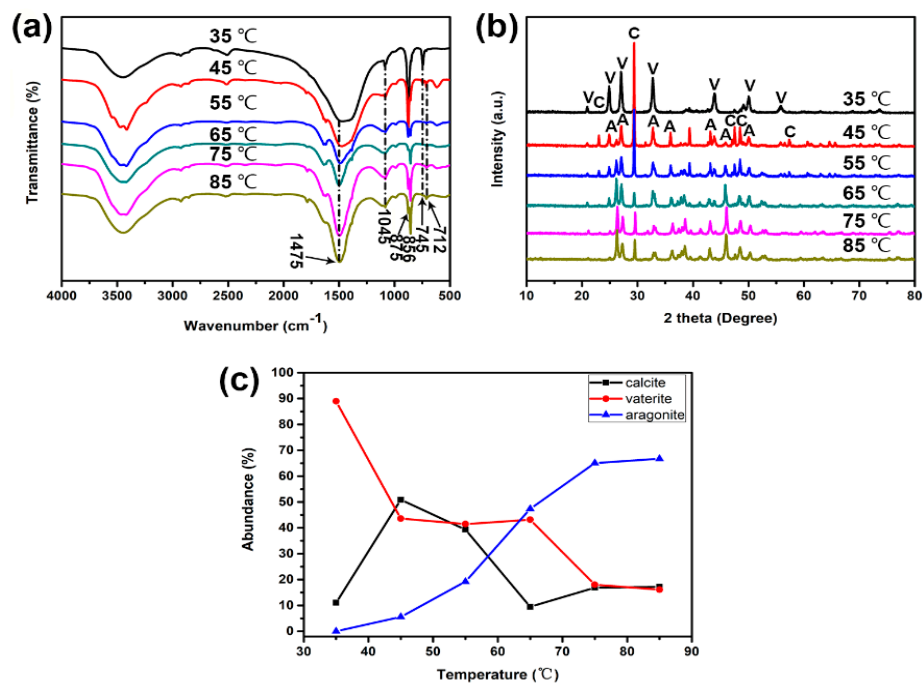

**Figure S4.** FTIR, XRD and content variation of CaCO<sub>3</sub> under reaction temperature(35 °C, 45 °C, 55 °C, 65 °C, 75 °C, and 85 °C).

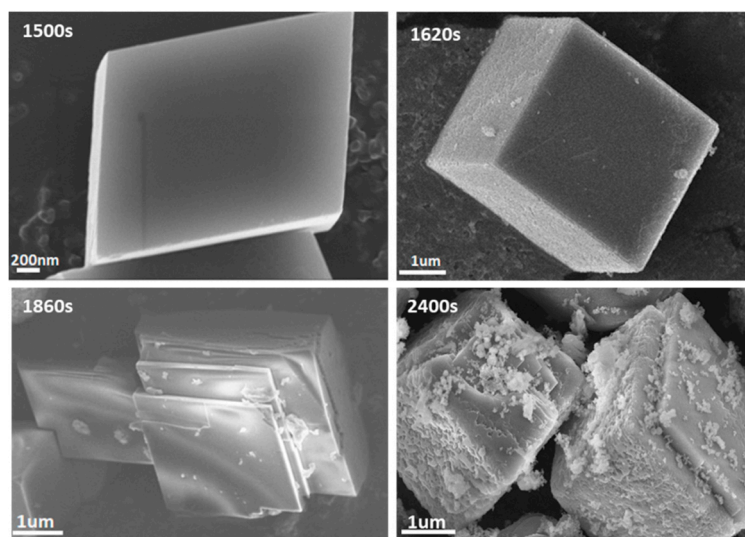

**Figure S5.** SEM images collected during the calcite dissolution process from 1500s to 2400s.

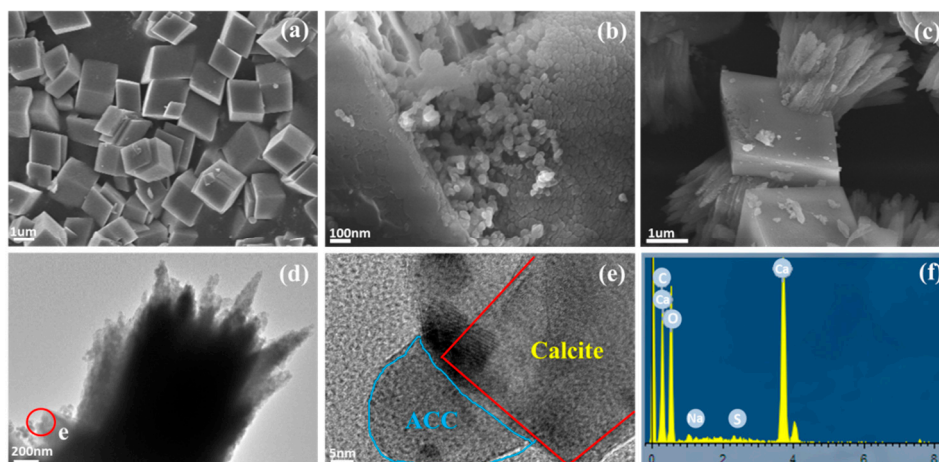

**Figure S6.** SEM images at reaction time of 1400s (a) and 2820s (b). TEM, HRTEM, and EDS of the typical mixed crystal, respectively(c) - (f).

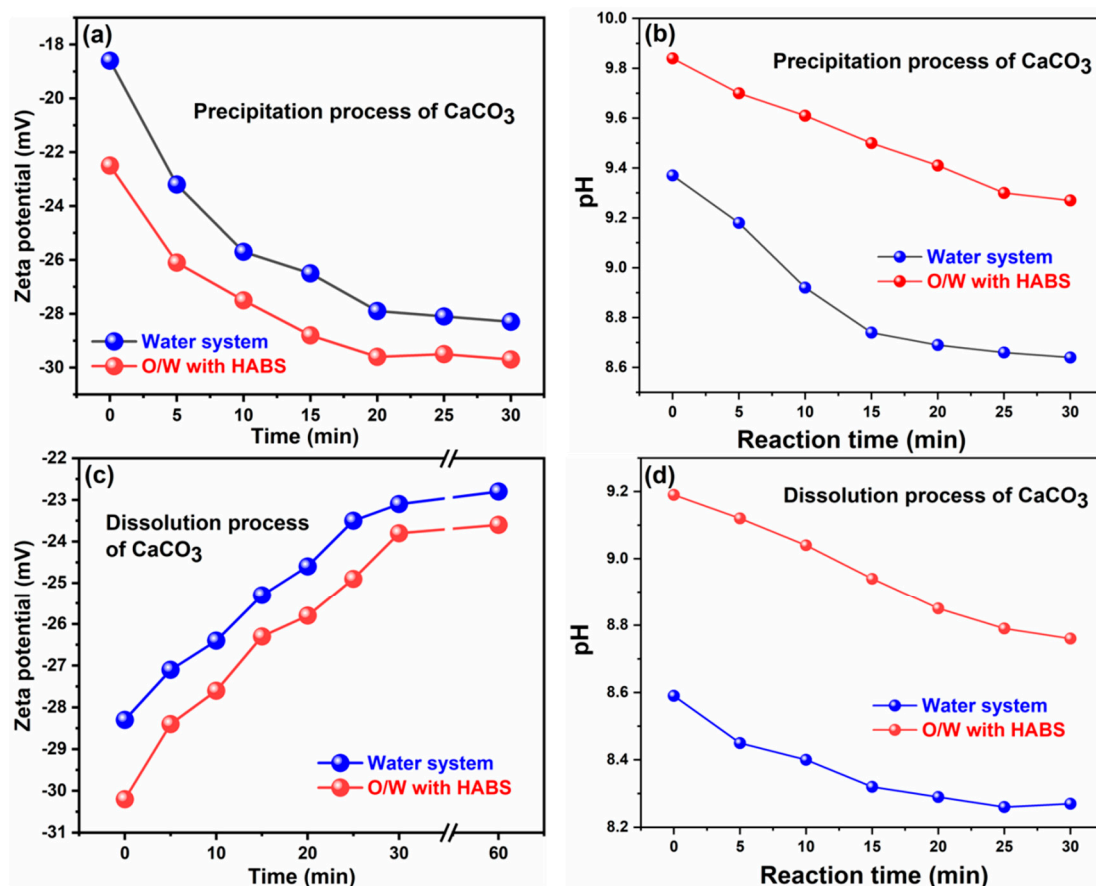

**Figure S7.** Trends in pH and Zeta potential during calcite precipitation process and calcite dissolution process in different systems.
